# Supplementary material for: Controlled aggregation and cell uptake of thermoresponsive polyoxazoline-grafted superparamagnetic iron oxide nanoparticles
Source: Royal Society of Chemistry journal article supplement (doi:10.1039/c6nr08654c), 2017-01-01
Supplement: c6nr08654c1.pdf [file c6nr08654c1.pdf]

# **Controlled aggregation and cell uptake of thermoresponsive polyoxazoline-grafted superparamagnetic iron oxide nanoparticles**

Steffen Kurzhals, Noga Gal, Ronald Zirbs and Erik Reimhult\*

## **ELECTRONIC SUPPORTING INFORMATION**

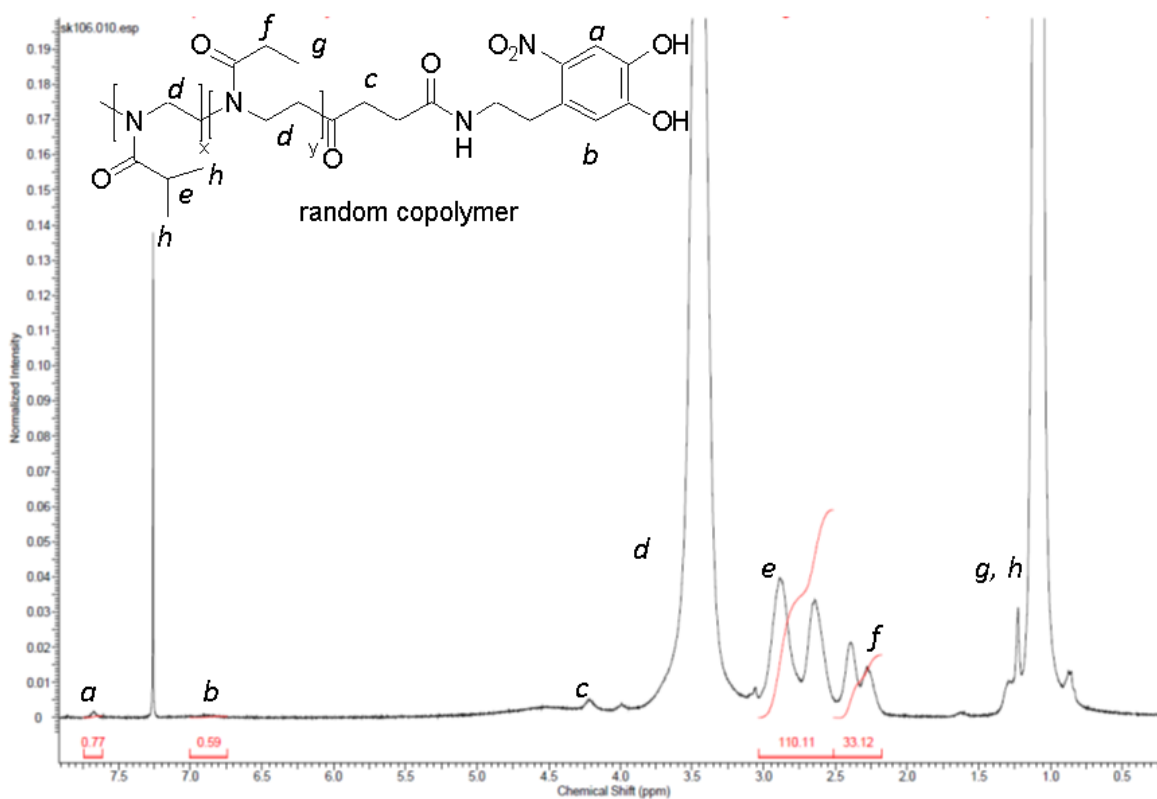

**Fig. S1**  $^1\text{H-NMR}$  spectrum of PIPOX/PETOX(87/13) in  $\text{CDCl}_3$ .

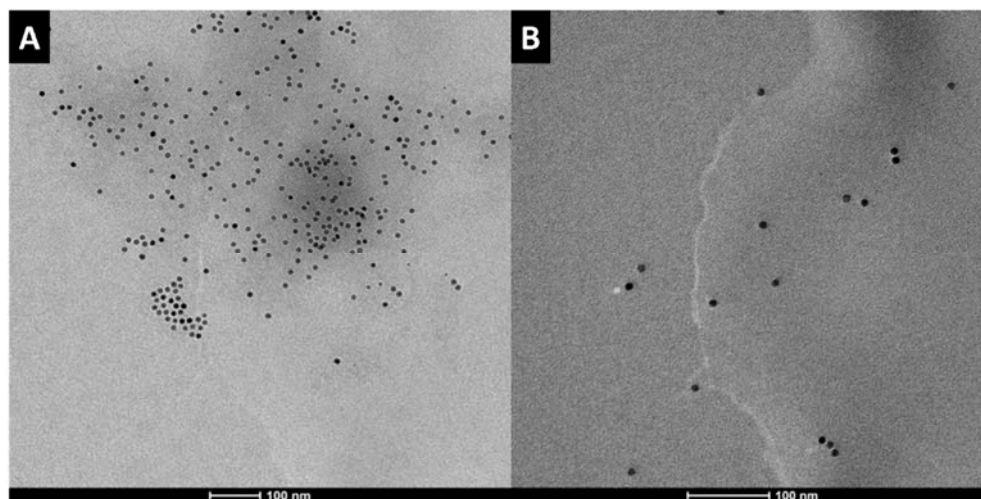

**Fig. S2** Transmission electron micrographs of (A)  $\text{Fe}_3\text{O}_4/\text{PIPOX}(100)$  and (B)  $\text{Fe}_3\text{O}_4/\text{PIPOX}/\text{PETOX}(87/13)$ , scale bar: 100 nm.

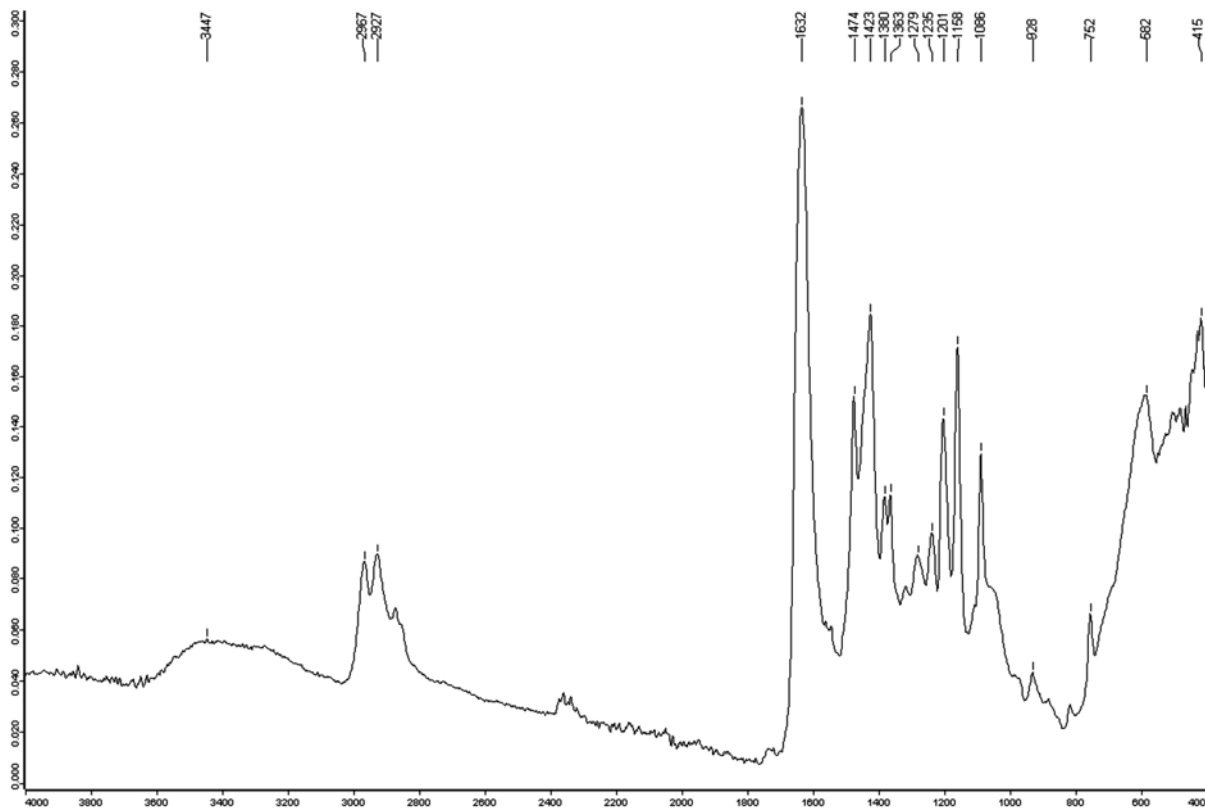

**Fig. S3** FTIR-spectrum of Fe<sub>3</sub>O<sub>4</sub>/PIPOX/PETOX(87/13), bands at 3447 cm<sup>-1</sup> (H<sub>2</sub>O) and 2336, 2359 cm<sup>-1</sup> (CO<sub>2</sub>).

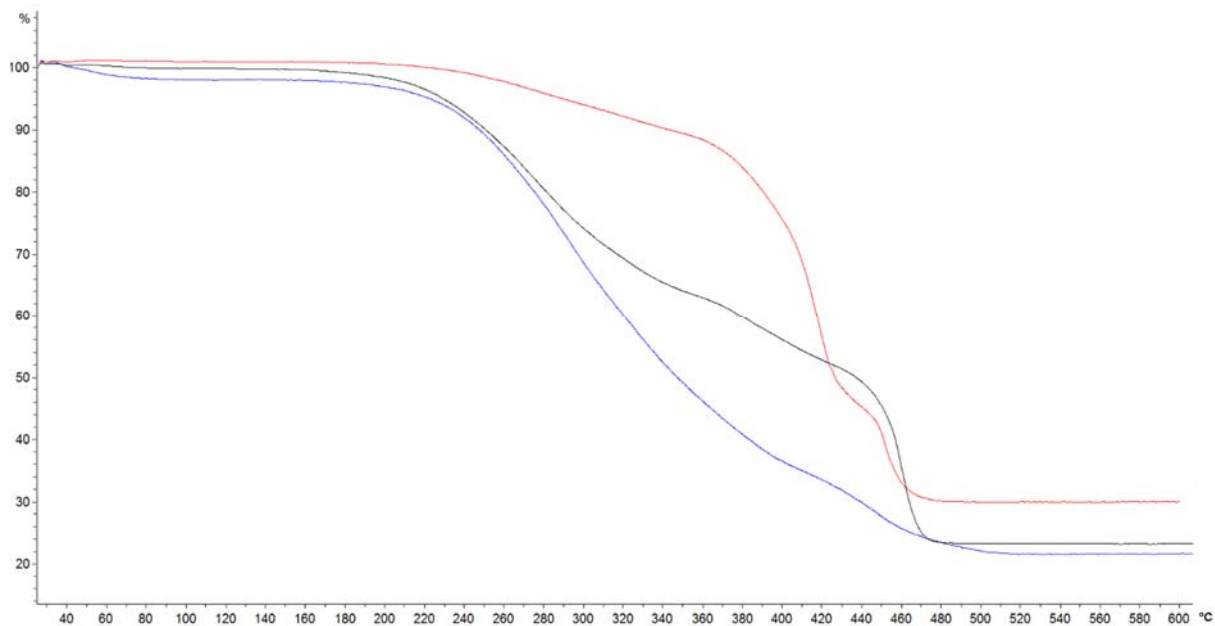

**Fig. S4** TGA of Fe<sub>3</sub>O<sub>4</sub>/PIPOX(100) (blue), Fe<sub>3</sub>O<sub>4</sub>/PIPOX/PETOX(87/13) (red) and Fe<sub>3</sub>O<sub>4</sub>/PETOX(100) (black) in synthetic air, 10 K min<sup>-1</sup> (25-600 °C).

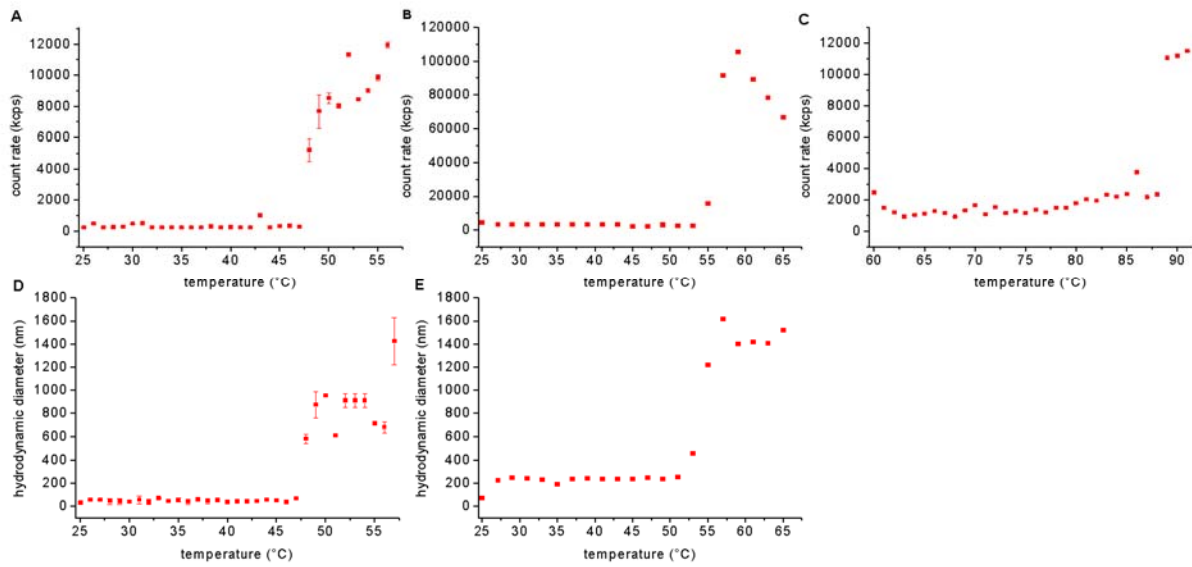

**Fig. S5** DLS heating curves for free polyoxazolines in MilliQ, count rate vs. temperature, and hydrodynamic diameter vs. temperature, (A, D) for PIPOX(100) (1 mg mL<sup>-1</sup>), (B, E) for PIPOX/PETOX(87/13) (1 mg mL<sup>-1</sup>) and (C) for PETOX(100) (7 mg mL<sup>-1</sup>).

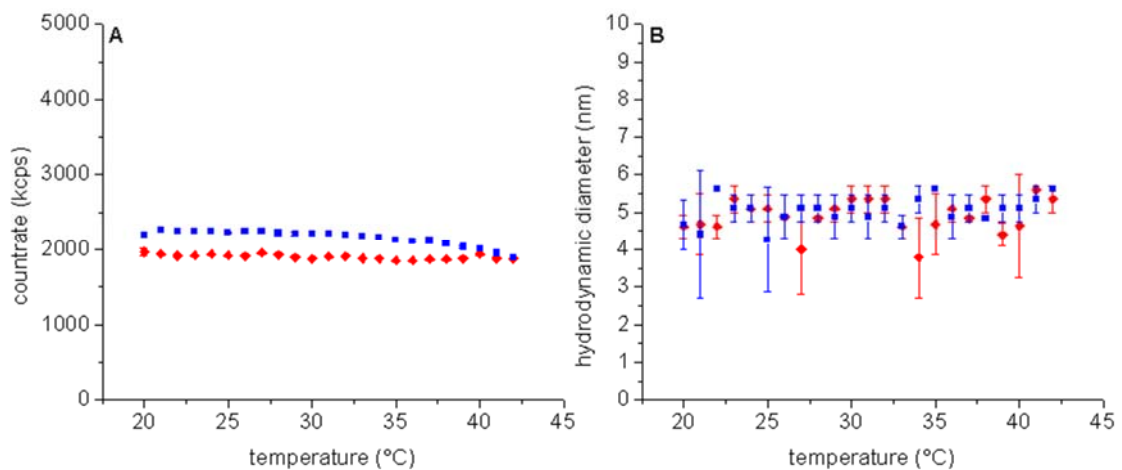

**Fig. S6** Temperature cycled DLS measurements for medium (RPMI-1540) with 10 vol% FCS, red diamonds: heating curve, blue squares: cooling curve.

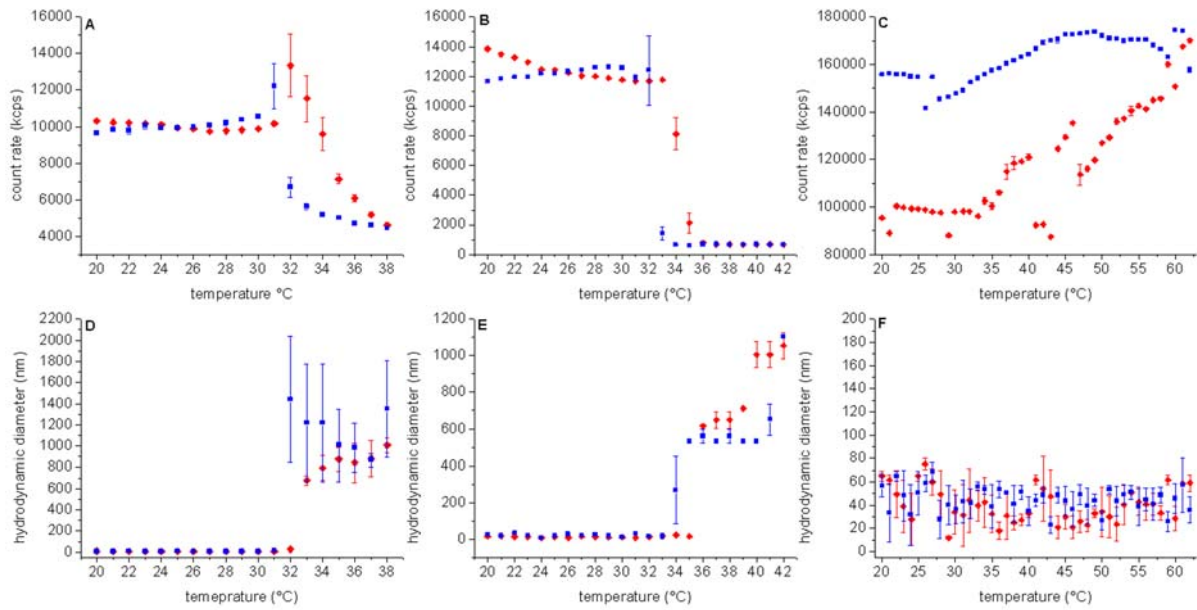

**Fig. S7** Temperature cycled DLS measurements for pozzylated SPIONs ( $1 \text{ mg mL}^{-1}$ ) in medium with 10 vol-% FCS, count rate vs. temperature and hydrodynamic diameter vs. temperature for  $\text{Fe}_3\text{O}_4/\text{PIPOX}(100)$  (A, D), for  $\text{Fe}_3\text{O}_4/\text{PIPOX}/\text{PETOX}(87/13)$  (B, E) and  $\text{Fe}_3\text{O}_4/\text{PETOX}(100)$  (C, F).

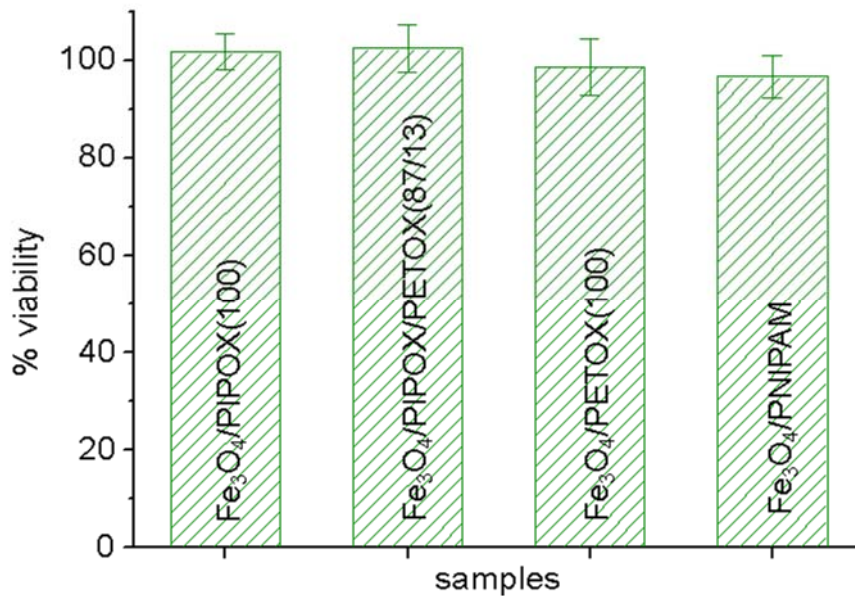

**Fig. S8** Viability of HeLa cells compared to control after incubation at  $37^\circ\text{C}$  for 24 h with pozzylated SPION (addition of  $10 \mu\text{L}$  SPION-dispersion ( $1 \text{ mg mL}^{-1}$  in MilliQ) to cells suspended in medium (RPMI-1640) ( $100 \mu\text{L}$ )).

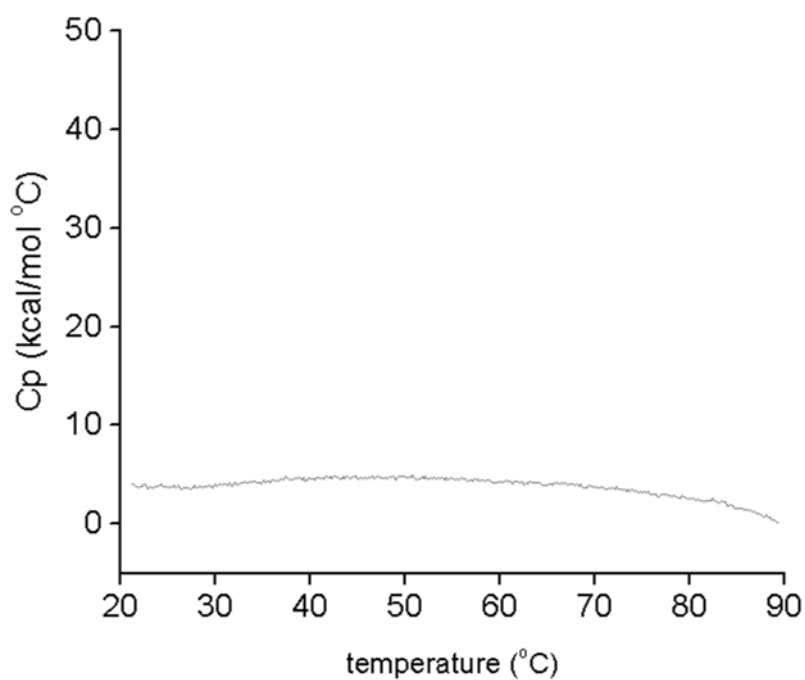

**Fig. S9** DSC heating curve ( $1\text{ }^{\circ}\text{C min}^{-1}$ ) for  $\text{Fe}_3\text{O}_4/\text{PETOX}(100)$ ,  $1\text{ mg mL}^{-1}$  in MilliQ water.

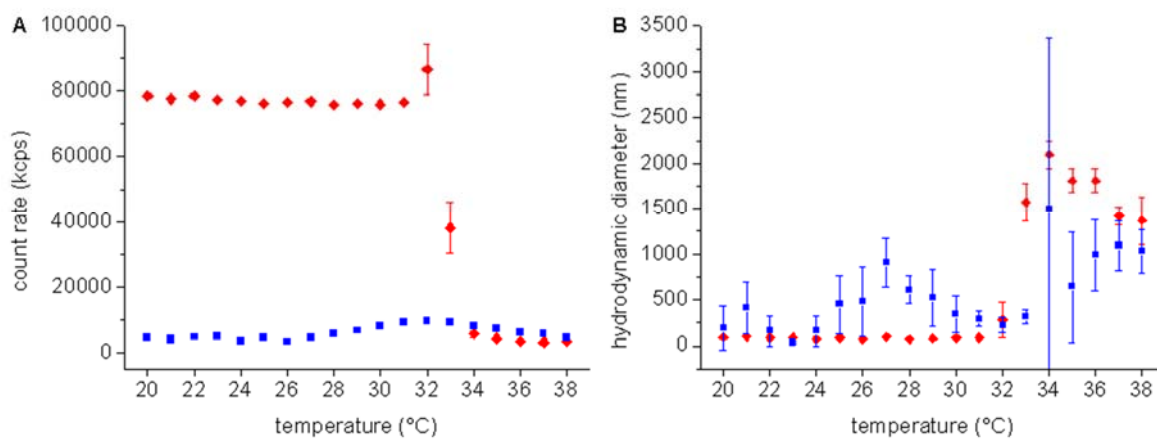

**Fig. S10** Temperature-cycled DLS measurements for SPION sample  $\text{Fe}_3\text{O}_4/\text{PNIPAM}$  ( $1\text{ mg mL}^{-1}$ ) in medium (RPMI-1640), A) count rate vs. temperature, B) hydrodynamic diameter vs. temperature.

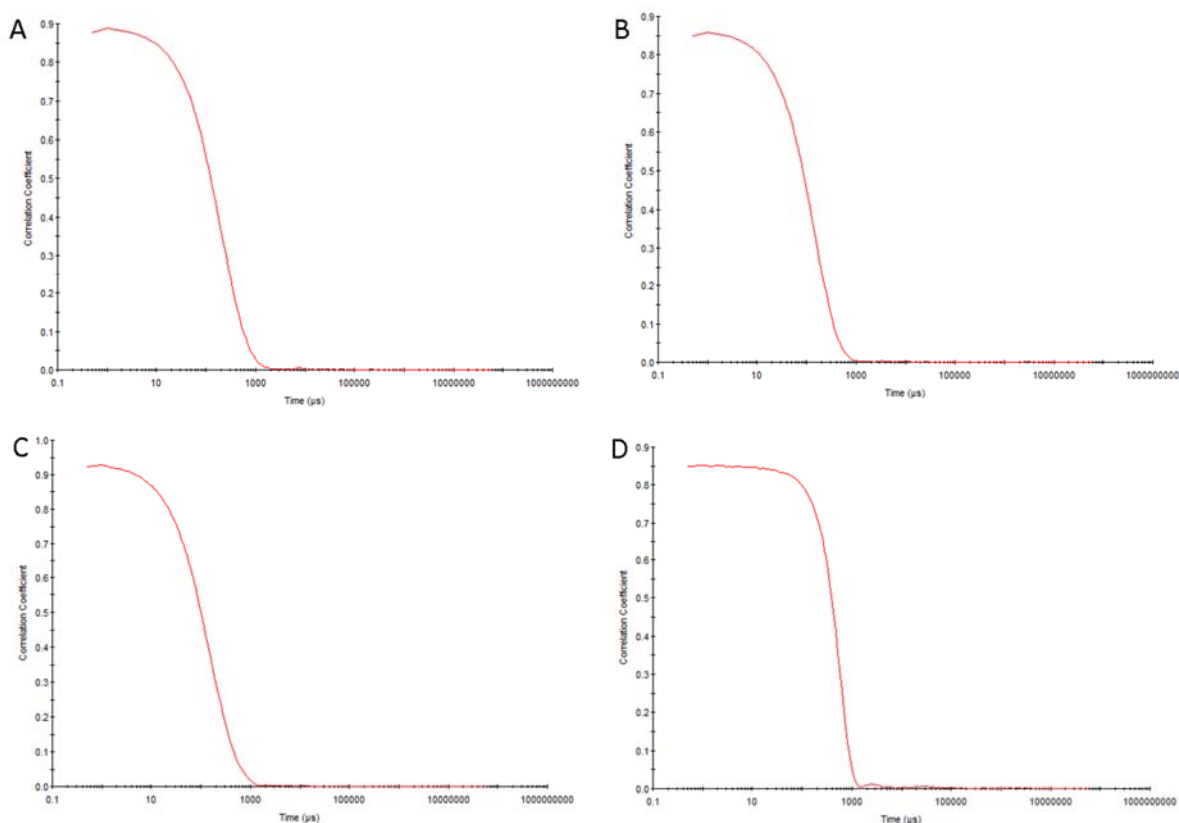

**Fig. S11** DLS correlation functions A-B) for SPION sample  $\text{Fe}_3\text{O}_4/\text{PIPOX}(100)$ , ( $1 \text{ mg mL}^{-1}$ ) in MilliQ water, A) at  $25^\circ\text{C}$ , B) at  $45^\circ\text{C}$ , C-D) for SPION sample  $\text{Fe}_3\text{O}_4/\text{PIPOX}/\text{PETOX}(87/13)$ , ( $1 \text{ mg mL}^{-1}$ ) in medium (RPMI-1640), C) at  $20^\circ\text{C}$ , D) at  $38^\circ\text{C}$ .

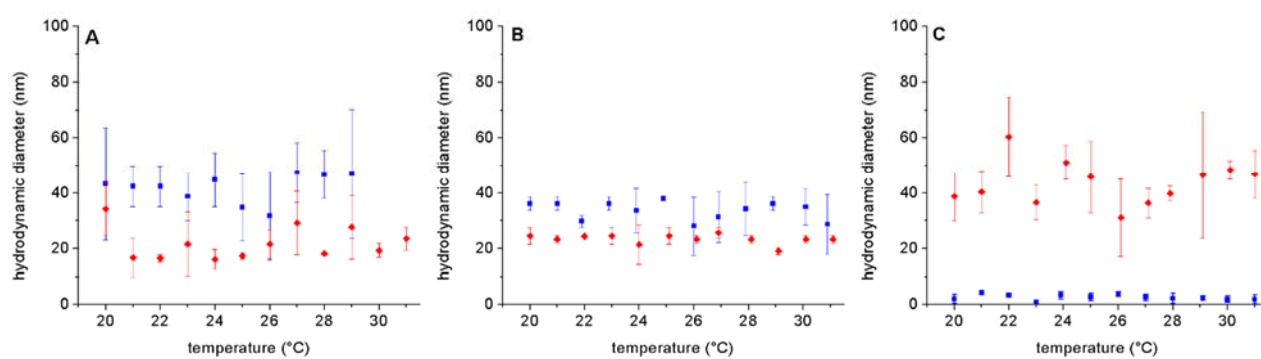

**Fig. S12** DLS heating curves (zoomed region from  $20$  to  $31^\circ\text{C}$  for Fig. 3 from main text) for SPION dispersed in medium (RPMI-1640) at  $1 \text{ mg mL}^{-1}$ , hydrodynamic diameter vs. temperature for A)  $\text{Fe}_3\text{O}_4/\text{PIPOX}(100)$ , B)  $\text{Fe}_3\text{O}_4/\text{PIPOX}/\text{PETOX}(87/13)$  and C)  $\text{Fe}_3\text{O}_4/\text{PETOX}(100)$ . Heating curve: red diamonds, cooling curve: blue squares.
